# Supplementary material for: Efficient hydrogenation of concentrated aqueous furfural solutions into furfuryl alcohol under ambient conditions in presence of PtCo bimetallic catalyst
Source: Royal Society of Chemistry journal article supplement (doi:10.1039/c6gc03143a), 2017-01-01
Supplement: c6gc03143a1.pdf [file c6gc03143a1.pdf]

## Supporting information

Efficient hydrogenation of concentrated aqueous furfural solutions in to furfuryl alcohol under ambient conditions in presence of PtCo bimetallic catalyst

Manisha Dohade<sup>1</sup>, and Paresh L. Dhepe<sup>1,\*</sup>

**Table S1.** Result of ICP –OES analysis of mono and bimetallic catalysts

| Catalyst        | Pt (wt %) | Co (wt %) |
|-----------------|-----------|-----------|
| Carbon          | -         | -         |
| Pt(2)/C         | 2.09      | -         |
| Pt(2)Co(0.25)/C | 2.07      | 0.24      |
| Pt(2)Co(1)/C    | 2.11      | 1.10      |
| Pt(2)Co(5)/C    | 2.14      | 5.08      |
| Pt(0.5)Co(3)/C  | 0.54      | 3.11      |
| Pt(1)Co(3)/C    | 1.15      | 3.13      |
| Pt(2)Co(3)/C    | 1.94      | 3.08      |
| Pt(3)Co(3)/C    | 3.10      | 3.12      |
| Pt(3)/C         | 2.98      | -         |
| Co(3)/C         | -         | 3.15      |

**Table S2.** BET surface area, pore volume and pore radius of catalyst

| Catalyst        | Surface area (m <sup>2</sup> /g) | Pore volume (cc/g) | Pore radius (Å) |
|-----------------|----------------------------------|--------------------|-----------------|
| Carbon          | 753                              | 0.42               | 16              |
| Pt(2)/C         | 704                              | 0.39               | 15              |
| Pt(2)Co(0.25)/C | 705                              | 0.44               | 18              |
| Pt(2)Co(1)/C    | 685                              | 0.45               | 15              |
| Pt(2)Co(5)/C    | 582                              | 0.41               | 17              |
| Pt(0.5)Co(3)/C  | 710                              | 0.52               | 16              |
| Pt(1)Co(3)/C    | 720                              | 0.52               | 16              |
| Pt(2)Co(3)/C    | 640                              | 0.47               | 15              |
| Pt(3)Co(3)/C    | 630                              | 0.39               | 15              |
| Pt(3)/C         | 662                              | 0.41               | 15              |
| Co(3)/C         | 712                              | 0.44               | 17              |

**Table S3.** Adsorption study of FAL and FOL on carbon

| Substrate | Adsorption on carbon (%) |
|-----------|--------------------------|
| FAL       | 4                        |
| FOL       | 3                        |

Study was carried out at room temperature, FAL, FOL, 0.35 g; carbon, 0.078 g; iso-propyl alcohol, 35 mL; 600 rpm stirring; 1 h; (FAL: Furfural, FOL: Furfuryl alcohol).

**Table S4.** Polarity index, Hansen solubility parameters (HSP) and solubility of FAL, FOL in different solvents

| <b>Solvent</b>             | <b>Polarity index</b> | <b>Hansen solubility parameter<br/>HSP (<math>\delta</math>/Mpa)</b> | <b>FAL Solubility (%)<sup>a</sup></b> | <b>FOL Solubility (%)<sup>a</sup></b> |
|----------------------------|-----------------------|----------------------------------------------------------------------|---------------------------------------|---------------------------------------|
| <b>Methanol</b>            | 5.1                   | 29.7                                                                 | 97                                    | 100                                   |
| <b>Ethanol</b>             | 4.3                   | 26                                                                   | 98                                    | 93                                    |
| <b>1-Propanol</b>          | 4                     | 24.3                                                                 | 100                                   | 98                                    |
| <b>2-Propanol</b>          | 3.9                   | 23.5                                                                 | 91                                    | 91                                    |
| <b>1-Butanol</b>           | 3.9                   | 23.1                                                                 | 100                                   | 100                                   |
| <b>2-Butanol</b>           | 4                     | 22.1                                                                 | 95                                    | 92                                    |
| <b>Toluene</b>             | 2.4                   | 18.2                                                                 | 88                                    | 88                                    |
| <b>Water</b>               | 10.2                  | 47.9                                                                 | 98                                    | 95                                    |
| <b>Water<sup>[a]</sup></b> | 10.2                  | 47.9                                                                 | 8                                     | 98                                    |
| <b>Furfural</b>            | -                     | 22.9                                                                 | -                                     | -                                     |
| <b>Furfuryl Alcohol</b>    | -                     | 25.6                                                                 | -                                     | -                                     |

Solubility was determined at room temperature, 35 mL solvent, 0.35 g FAL and FOL, (a) 14 g (40 wt%) FAL and 14 g (40 wt%) FOL (FAL: Furfural, FOL: Furfuryl alcohol).

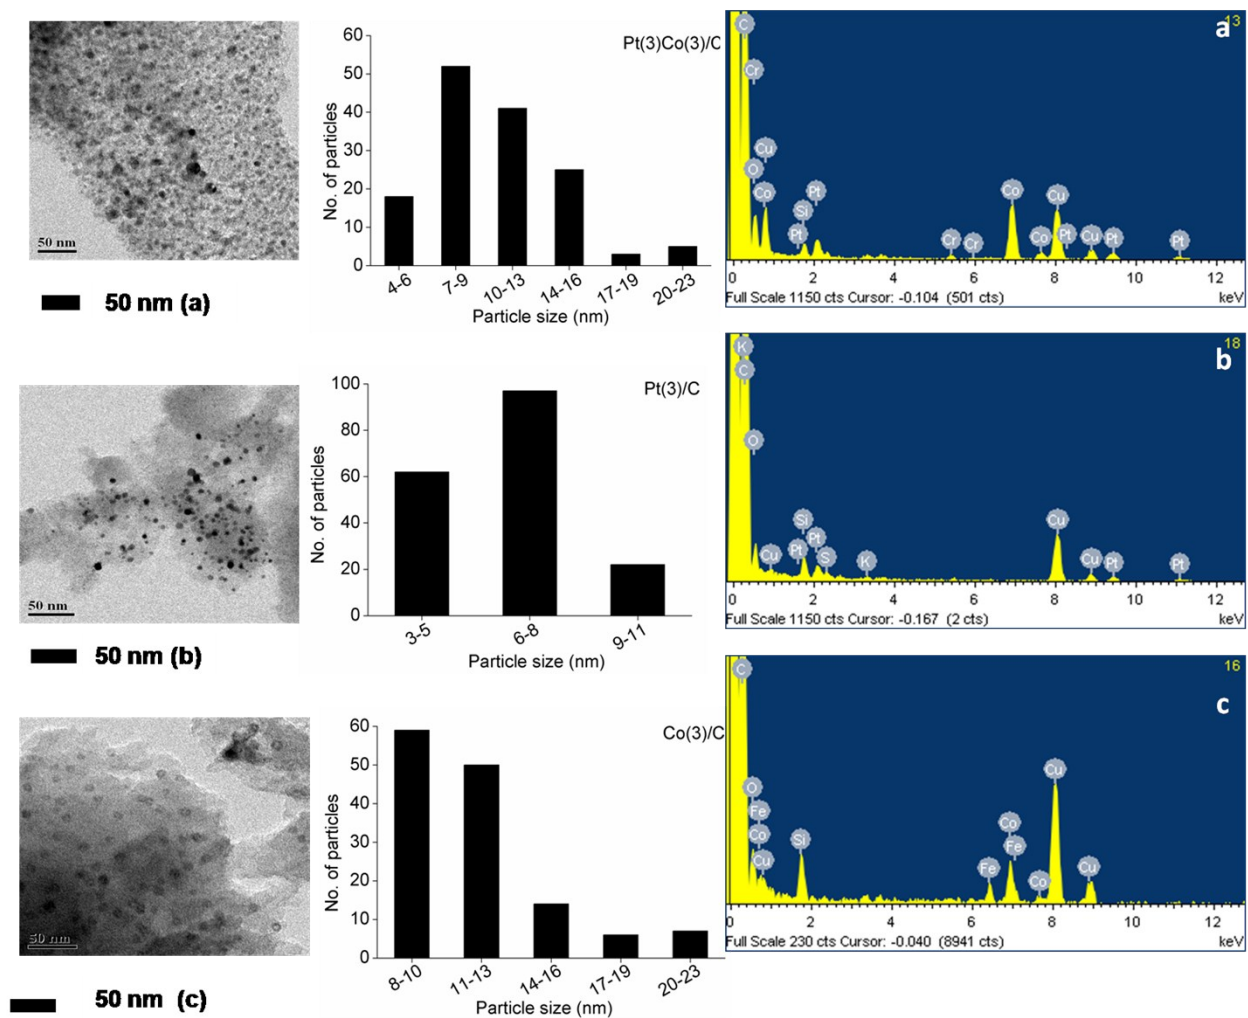

**Figure S1.** TEM images, particle size distribution and EDX spectra of (a) Pt(3)Co(3)/C, (b) Pt(3)/C, (c) Co(3)/C catalyst.

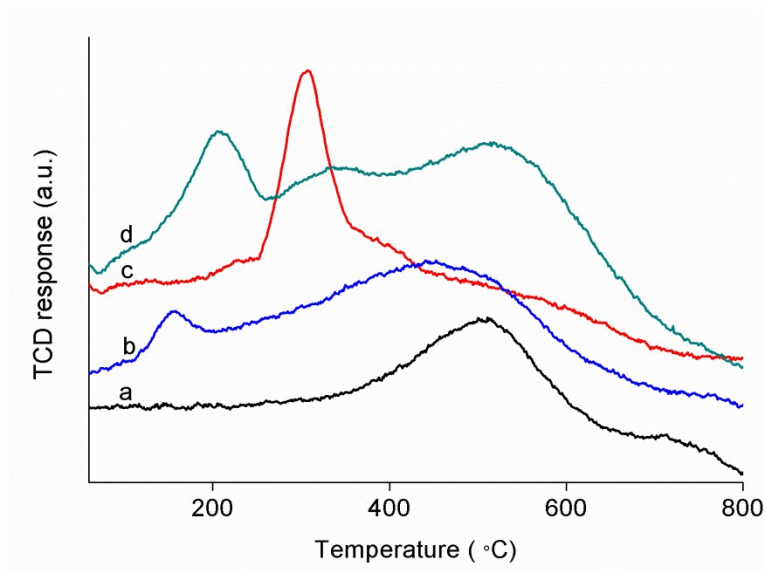

**Figure S2.** TPR profile of the mono and bimetallic catalyst supported on Carbon; (a) Carbon (b) Pt(3)/C, (c) Co(3)/C, (d) Pt(3)Co(3)/C, catalyst.

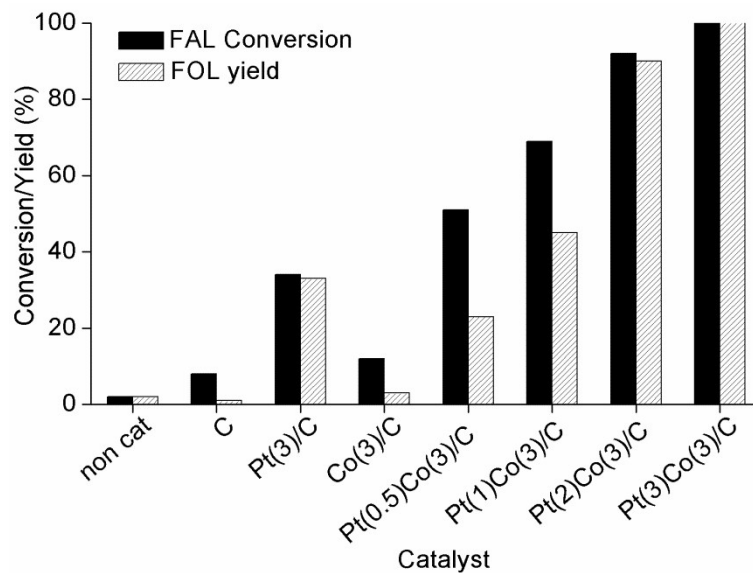

**Figure S3.** Effect of varying Pt loading with Co(3)/C on hydrogenation of FAL to FOL. Reaction condition: FAL, 0.35 g; catalyst, 0.078 g; iso-propyl alcohol, 35 mL; 100 °C; 5 h; H<sub>2</sub>, 1 MPa at room temperature; 900 rpm (FAL: Furfural, FOL: Furfuryl alcohol).

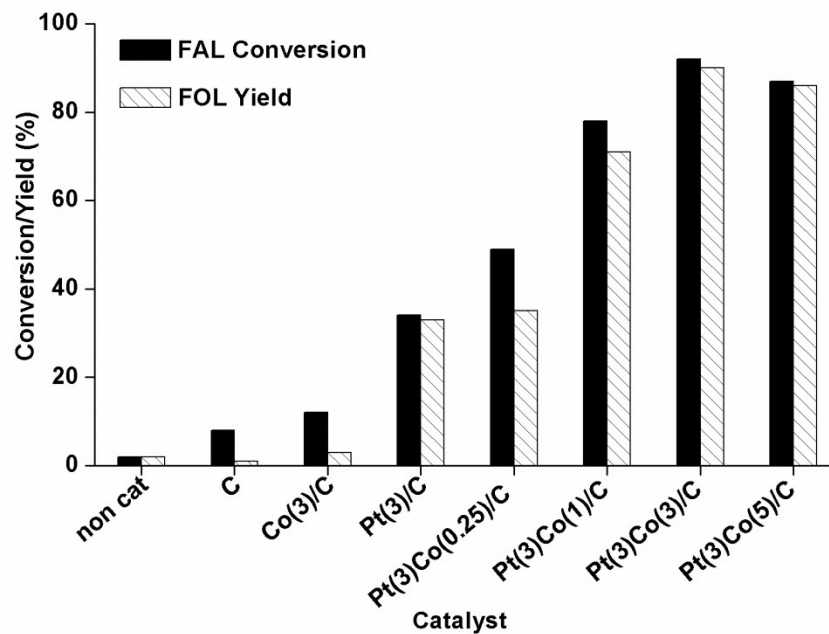

**Figure S4.** Effect of varying Co loading with Pt(3)/C on hydrogenation of FAL to FOL. Reaction condition: FAL, 0.35 g; catalyst, 0.078 g; iso-propyl alcohol, 35 mL; 100 °C; 5 h; H<sub>2</sub>, 1 MPa at room temperature; 900 rpm (FAL: Furfural, FOL: Furfuryl alcohol)

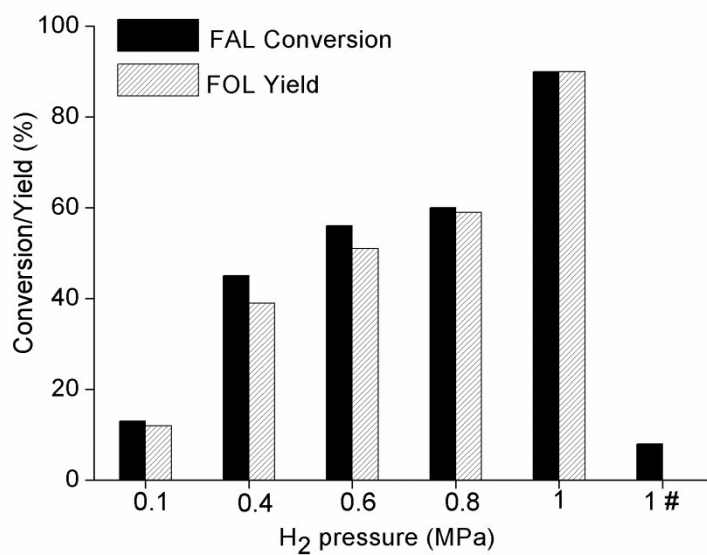

**Figure S5.** Effect of H<sub>2</sub> pressure on the hydrogenation of FAL to FOL. Reaction condition: FAL, 0.35 g; Pt(3)Co(3)/C, 0.078 g; iso-propyl alcohol, 35 mL; 50 °C; 10 h; 900 rpm (FAL- Furfural, FOL – Furfuryl alcohol, # - N<sub>2</sub> pressure)

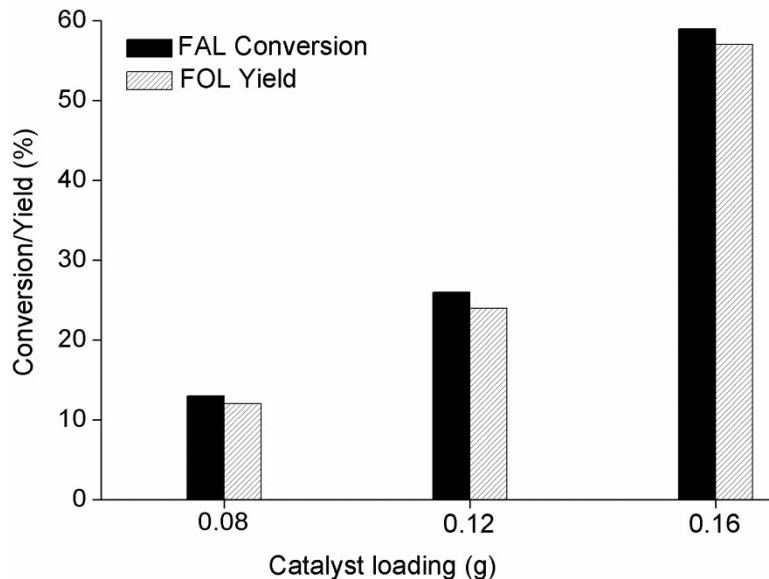

**Figure S6.** Effect of catalyst loading at 0.1 MPa H<sub>2</sub> pressure on hydrogenation of FAL to FOL. Reaction condition: FAL, 0.35 g; Pt(3)Co(3)/C; iso-propyl alcohol, 35 mL; 50 °C; 10 h; H<sub>2</sub>, 0.1 MPa at room temperature; 900 rpm (FAL: Furfural, FOL: Furfuryl alcohol)

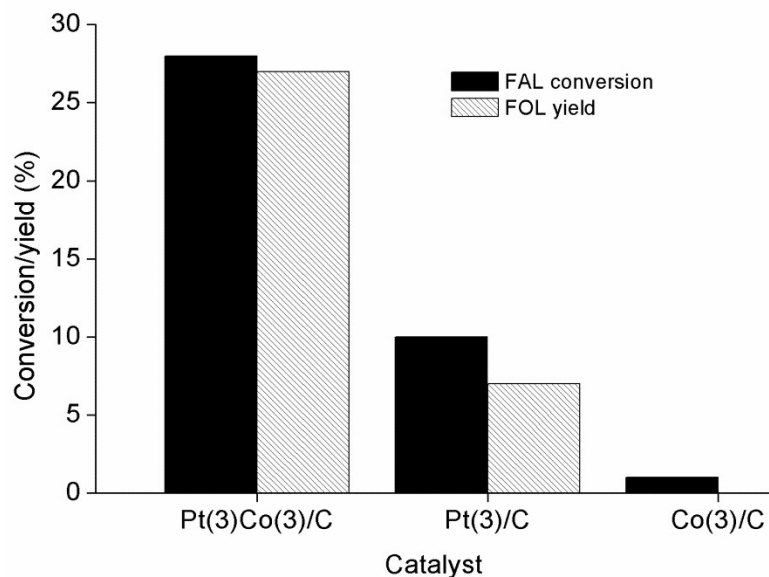

**Figure S7.** Effect of mono and bimetallic catalyst in water on hydrogenation of FAL to FOL. Reaction condition: FAL, 0.35 g; Pt(3)Co(3)/C; water, 35 mL; 35 °C; 10 min; H<sub>2</sub>, 1 MPa at room temperature; 900 rpm (FAL: Furfural, FOL: Furfuryl alcohol)

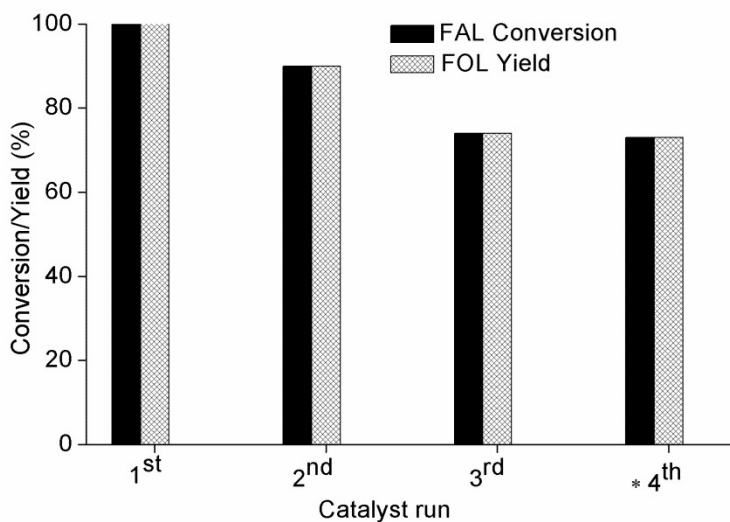

**Figure S8.** Recycle study of Pt(3)Co(3)/C catalyst in hydrogenation of FAL to FOL. Reaction condition: FAL, 0.35 g, water, 35 mL, Pt(3)Co(3)/C catalyst, 0.078 g, H<sub>2</sub>, 1 MPa at room temperature, 35 °C, 10 h, 900 rpm (\*4<sup>th</sup> catalytic run: Catalyst recovered from 3<sup>rd</sup> catalytic run was reduced at 400 °C, 2 h under H<sub>2</sub> flow. 0.050 g catalyst was recovered from 3<sup>rd</sup> run. FAL: Furfural, FOL: Furfuryl alcohol).

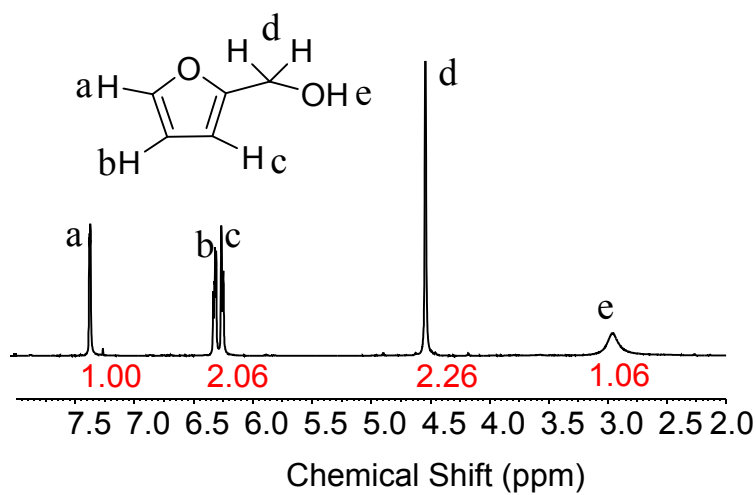

**Figure S9.** <sup>1</sup>H NMR spectra of Furfuryl alcohol (extracted product).



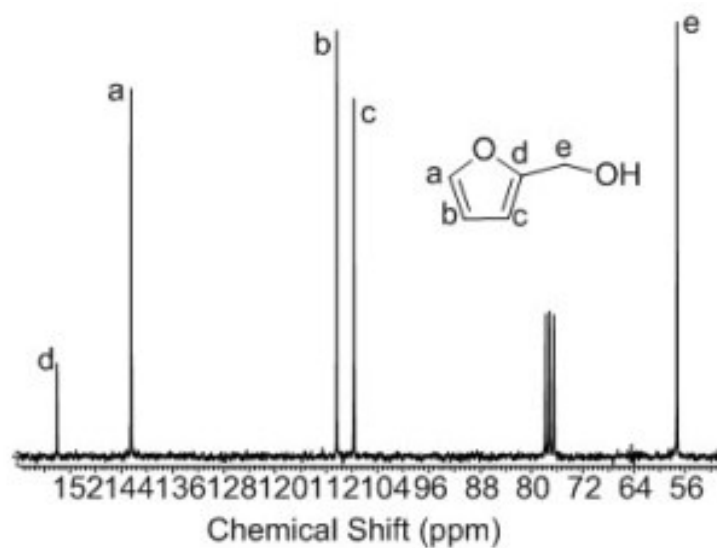

**Figure S10.**  $^{13}\text{C}$  NMR spectra of Furfuryl alcohol (extracted product).

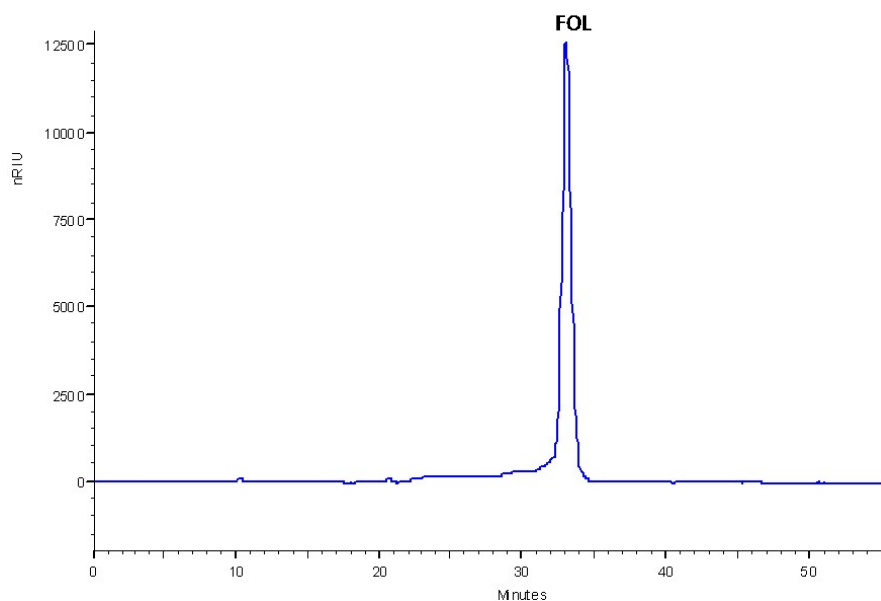

**Figure S11.** HPLC profile of reaction mixture after completion of reaction (Reaction condition; FAL, 0.35 g; water, Pt(3)Co(3)/C, 0.078 g; water, 35 mL; 35 °C; 10 h;  $\text{H}_2$ , 0.1MPa at room temperature) (FAL: Furfural, FOL: Furfuryl alcohol)

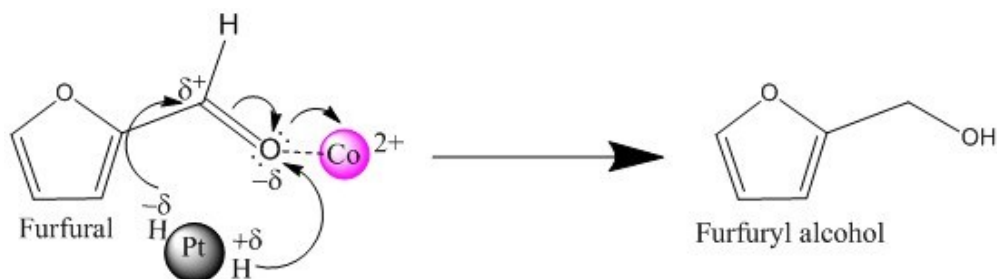

**Figure S12.** Proposed reaction mechanism for conversion of furfural to furfuryl alcohol

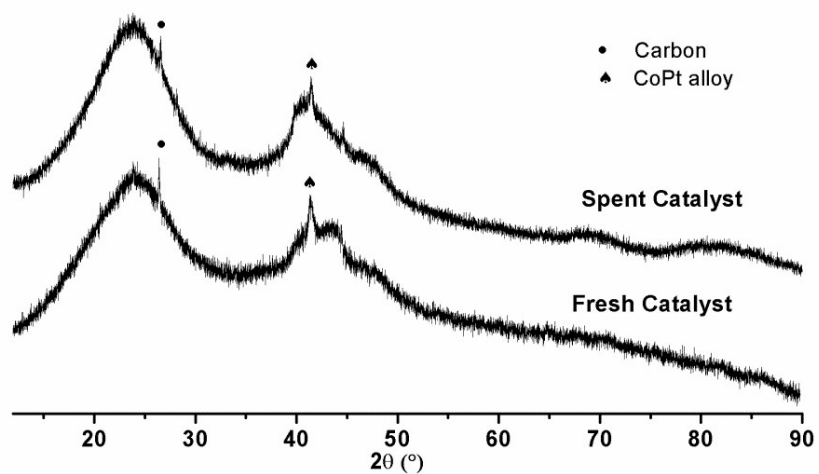

**Figure S13.** XRD patterns of fresh and spent Pt(3)Co(3)/C catalyst.

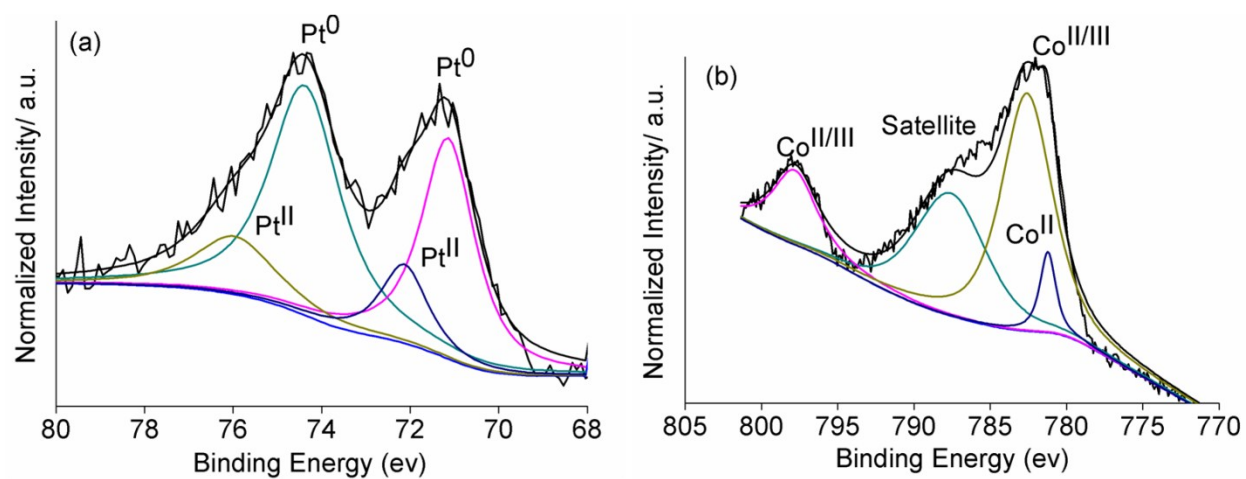

**Figure S14.** XPS spectra of spent Pt(3)Co(3)/C catalyst (a) deconvoluted XPS spectrum for Pt 4f level, (b) deconvoluted XPS spectrum Co 2p level.

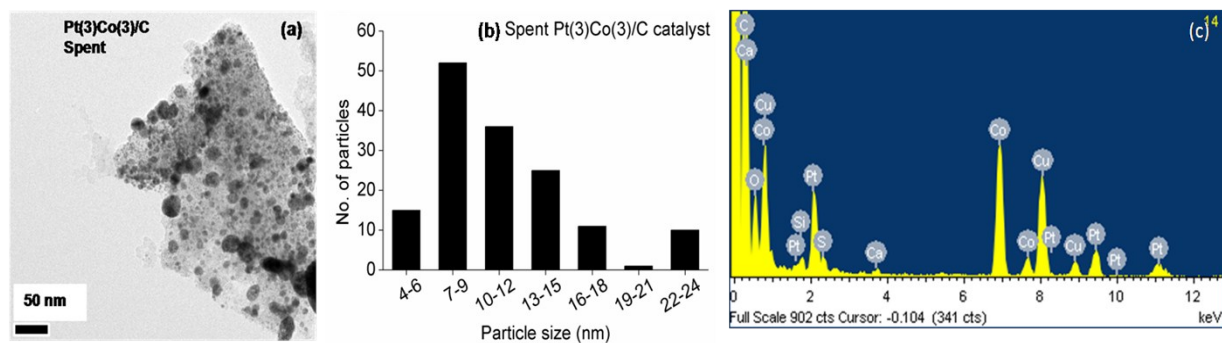

**Figure S15.** (a) TEM image of Pt(3)Co(3)/C spent catalyst, (b) Particle size distribution of Pt(3)Co(3)/C spent catalyst, (c) EDX spectra of spent catalyst
